# Supplementary material for: In situspace-confined growth of Co3O4nanoparticles inside N-doped hollow porous carbon nanospheres as bifunctional oxygen electrocatalysts for high-performance rechargeable zinc–air batteries
Source: Royal Society of Chemistry journal article supplement (doi:10.1039/d2dt04000j), 2023-01-01
Supplement: d2dt04000j1.pdf [file d2dt04000j1.pdf]

## Supplementary materials

### **In-situ Space-Confined Growth of Co<sub>3</sub>O<sub>4</sub> Nanoparticles Inside N-Doped Hollow Porous Carbon Nanospheres as Bifunctional Oxygen Electrocatalysts for High-performance Rechargeable Zinc-Air Batteries**

Jingbiao Kuang<sup>a</sup>, Nengfei Yu<sup>a,\*</sup>, Zhongtang Yang<sup>a</sup>, Yi Zhang<sup>a</sup>, Lifei Ji<sup>b</sup>, Jilei Ye<sup>a,\*</sup>, Wen Huang<sup>b</sup>,  
Qinghong Huang<sup>a</sup>, Na Tian<sup>b</sup>, Yuping Wu<sup>a</sup> and Shigang Sun<sup>b</sup>

<sup>a</sup> School of Energy Science and Engineering, Nanjing Tech University, Nanjing, 211816, China

<sup>b</sup> State Key Laboratory of Physical Chemistry of Solid Surfaces, College of Chemistry and Chemical Engineering, Xiamen University, Xiamen 361005, China

E-mail: yunf@njtech.edu.cn; yejilei@njtech.edu.cn

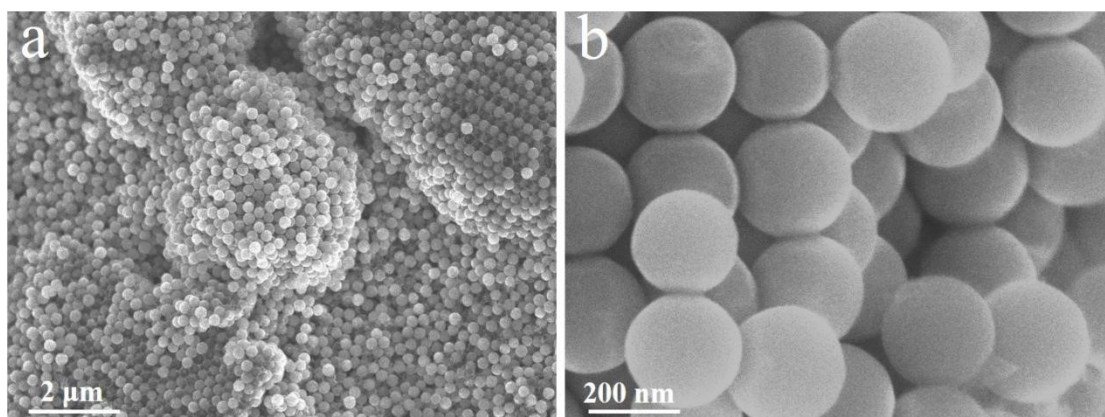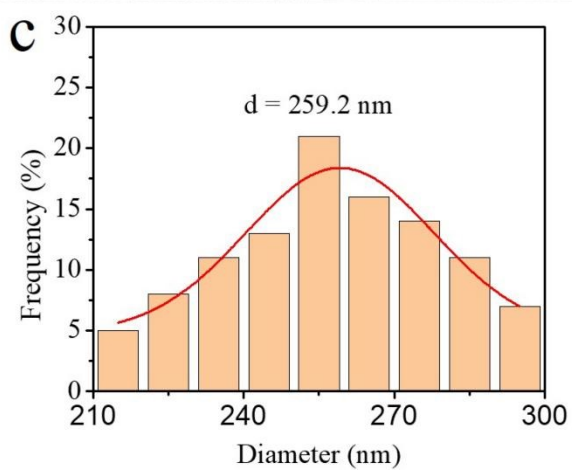

**Figure S1.** a) FESEM and b) enlarged FESEM images of SiO<sub>2</sub> nanospheres. c) size distribution of SiO<sub>2</sub> nanospheres

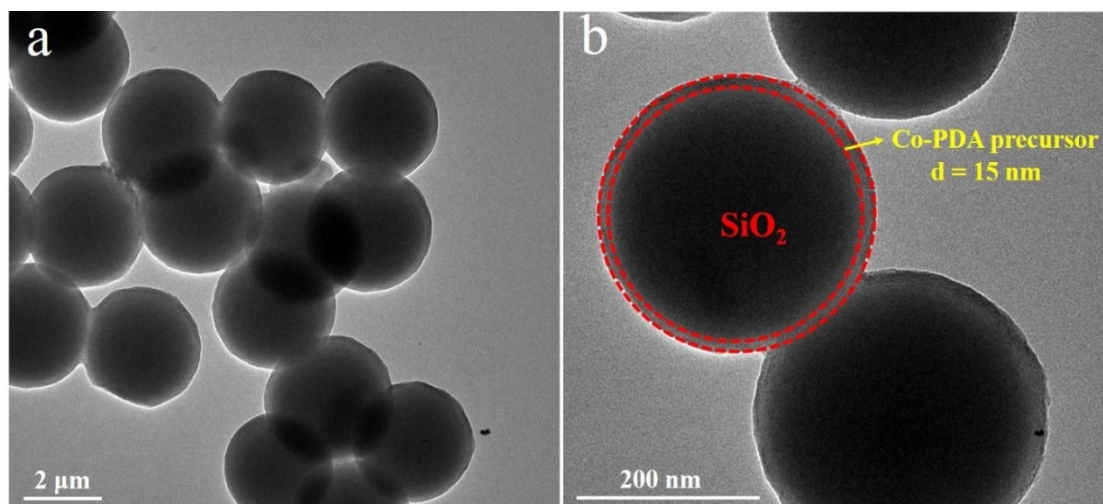

**Figure S2.** TEM images of SiO<sub>2</sub>@Co-PDA nanospheres.

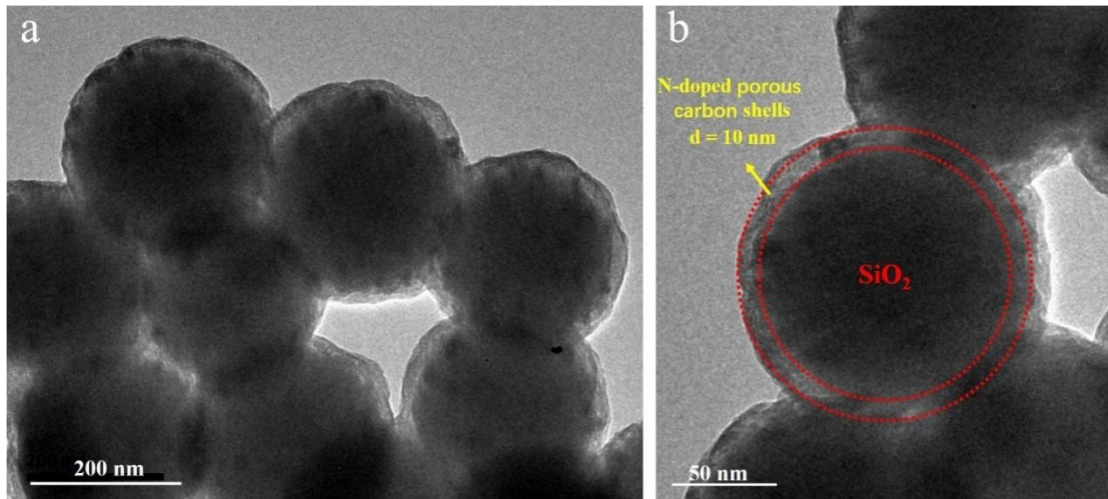

**Figure S3.** TEM images of SiO<sub>2</sub>@Co<sub>3</sub>O<sub>4</sub>@N-PCSs nanospheres.

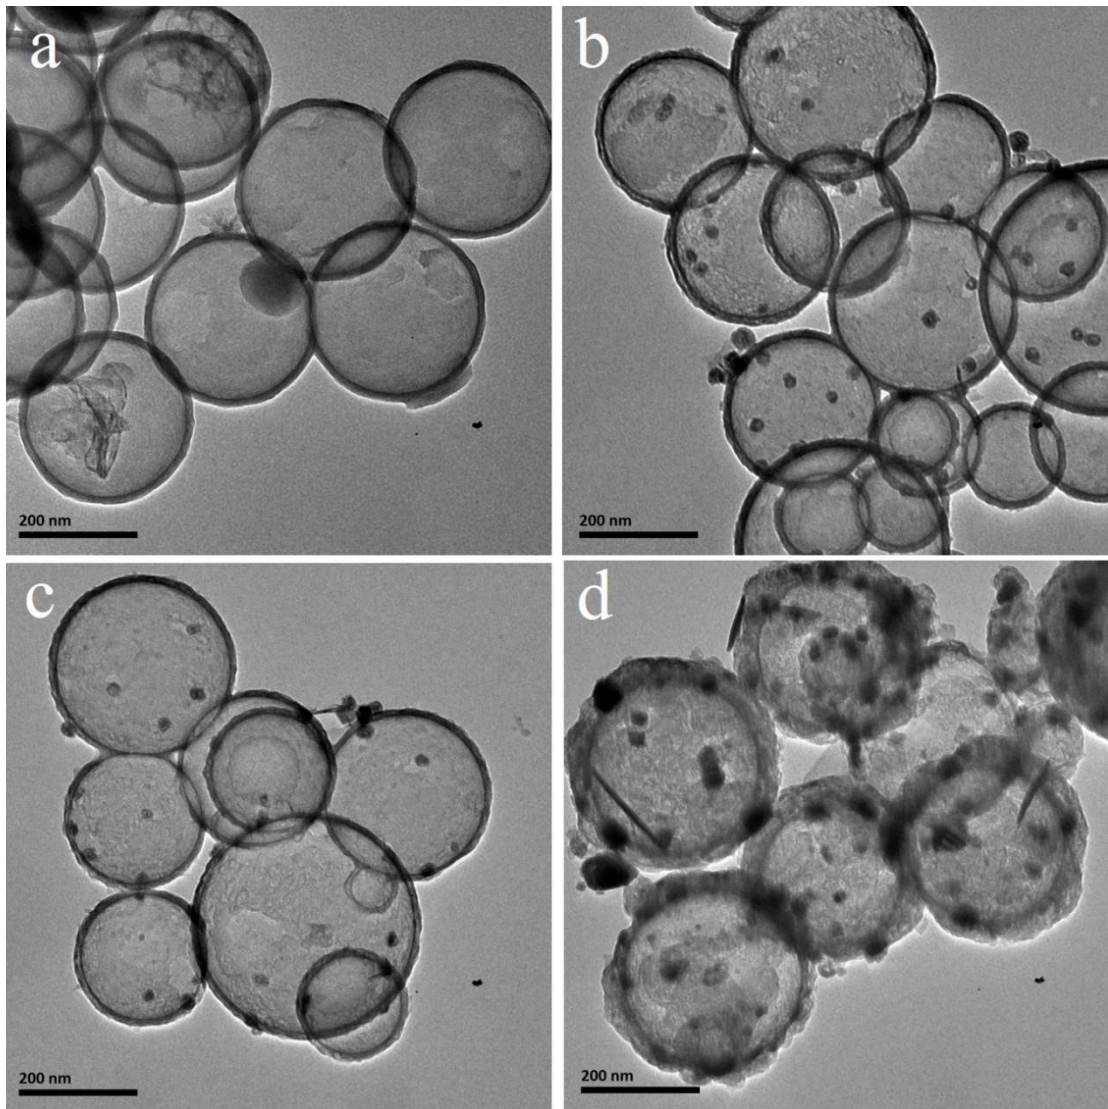

**Figure S4.** TEM images of a) N-HPCNs, b) Co<sub>3</sub>O<sub>4</sub>-5%@N-HPCNs, c) Co<sub>3</sub>O<sub>4</sub>-10%@N-HPCNs and d) Co<sub>3</sub>O<sub>4</sub>-15%@N-HPCNs.

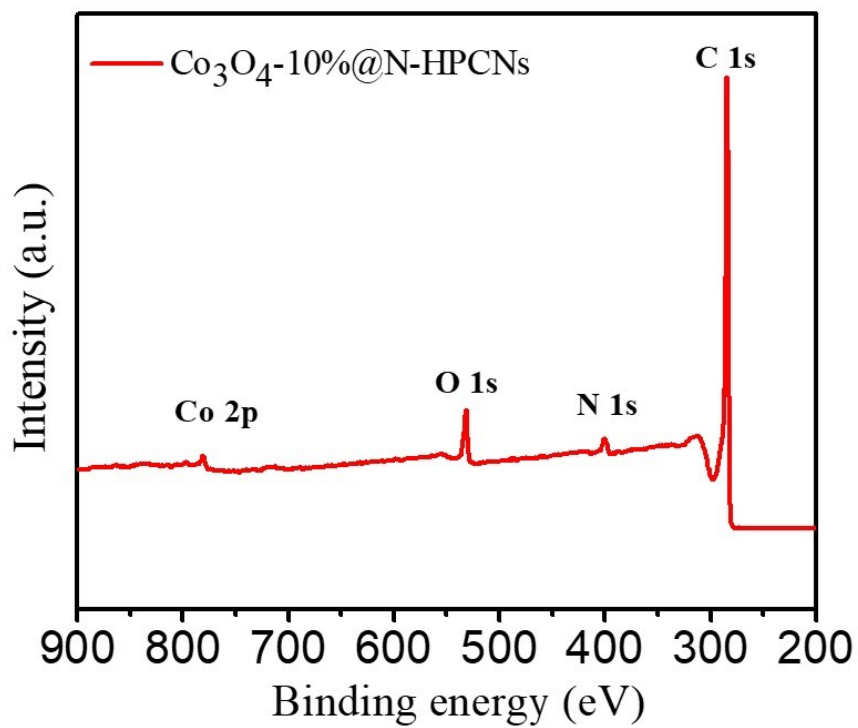

**Figure S5.** XPS survey spectrums of Co<sub>3</sub>O<sub>4</sub>-10%@N-HPCNs

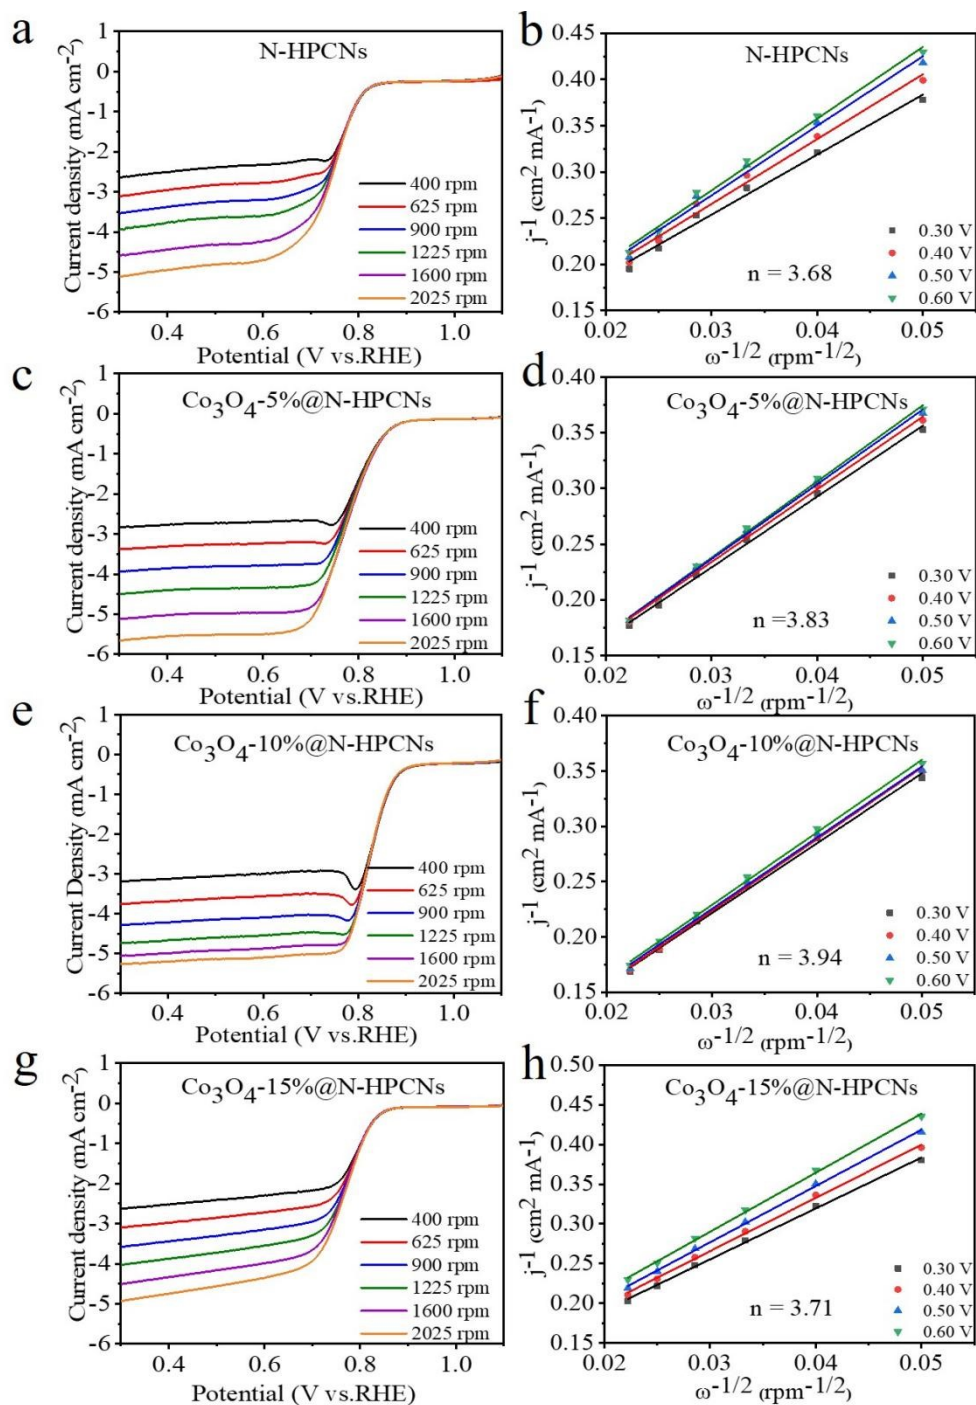

**Figure S6.** The RDE measurements of a) N-HPCNs, c) Co<sub>3</sub>O<sub>4</sub>-5%@N-HPCNs, e) Co<sub>3</sub>O<sub>4</sub>-10%@N-HPCNs and g) Co<sub>3</sub>O<sub>4</sub>-15%@N-HPCNs at a scan rate of 10 mV s<sup>-1</sup>, The Koutecky-Levich (K-L) plots of b) N-HPCNs, d) Co<sub>3</sub>O<sub>4</sub>-5%@N-HPCNs, f) Co<sub>3</sub>O<sub>4</sub>-10%@N-HPCNs and h) Co<sub>3</sub>O<sub>4</sub>-15%@N-HPCNs.

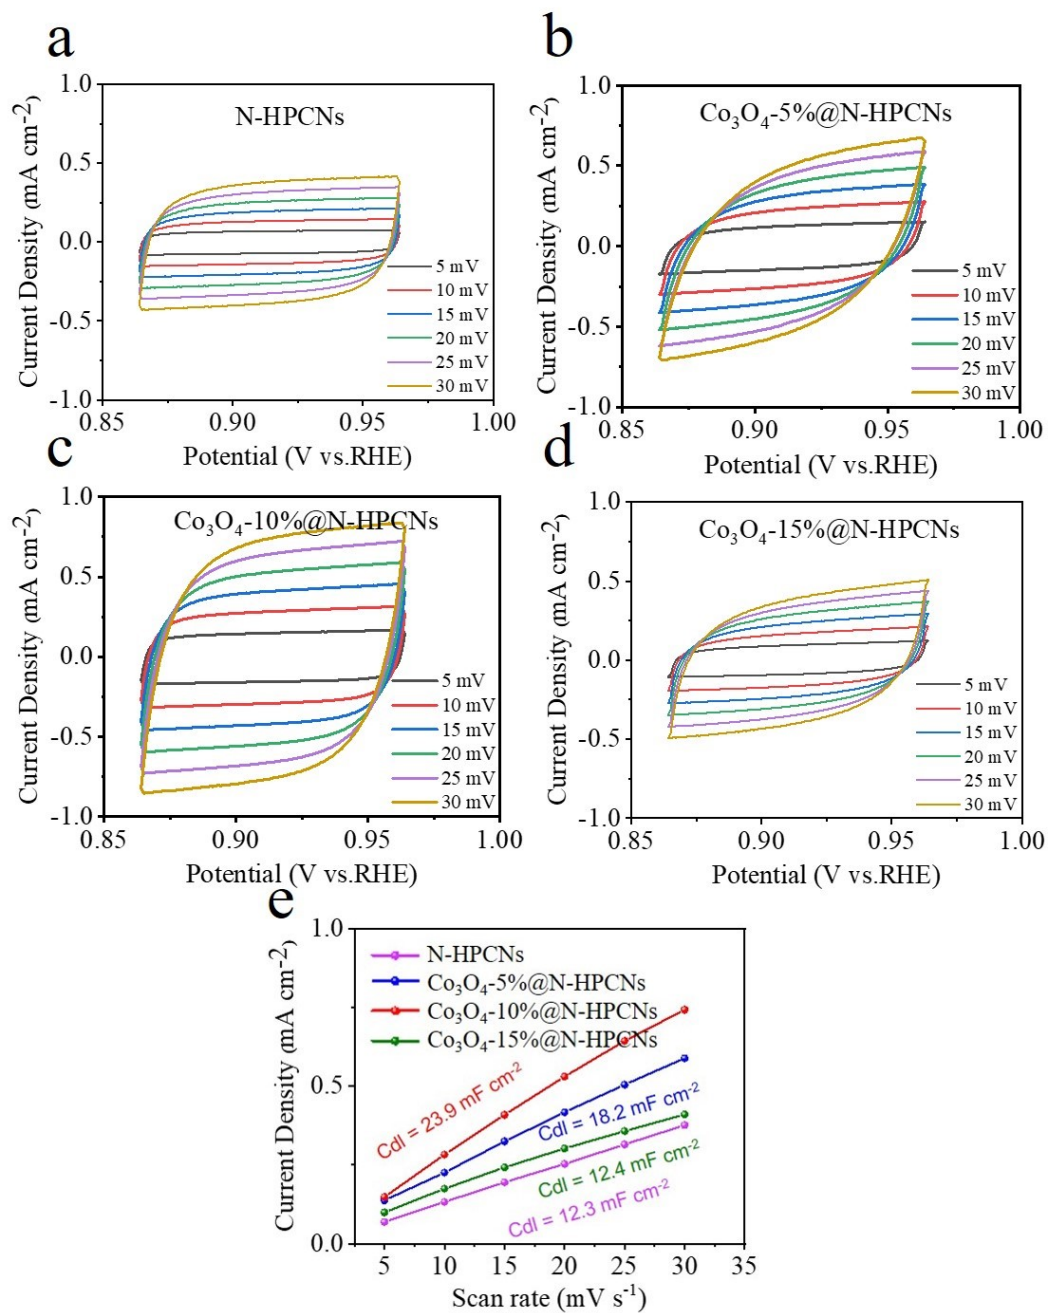

**Figure S7.** Scan rate dependence of current densities in CV curves for different electrocatalysts for ORR. a) N-HPCNs, b) Co<sub>3</sub>O<sub>4</sub>-5%@N-HPCNs, c) Co<sub>3</sub>O<sub>4</sub>-10%@N-HPCNs, d) Co<sub>3</sub>O<sub>4</sub>-15%@N-HPCNs, e) Calculated Cdl values for all samples.



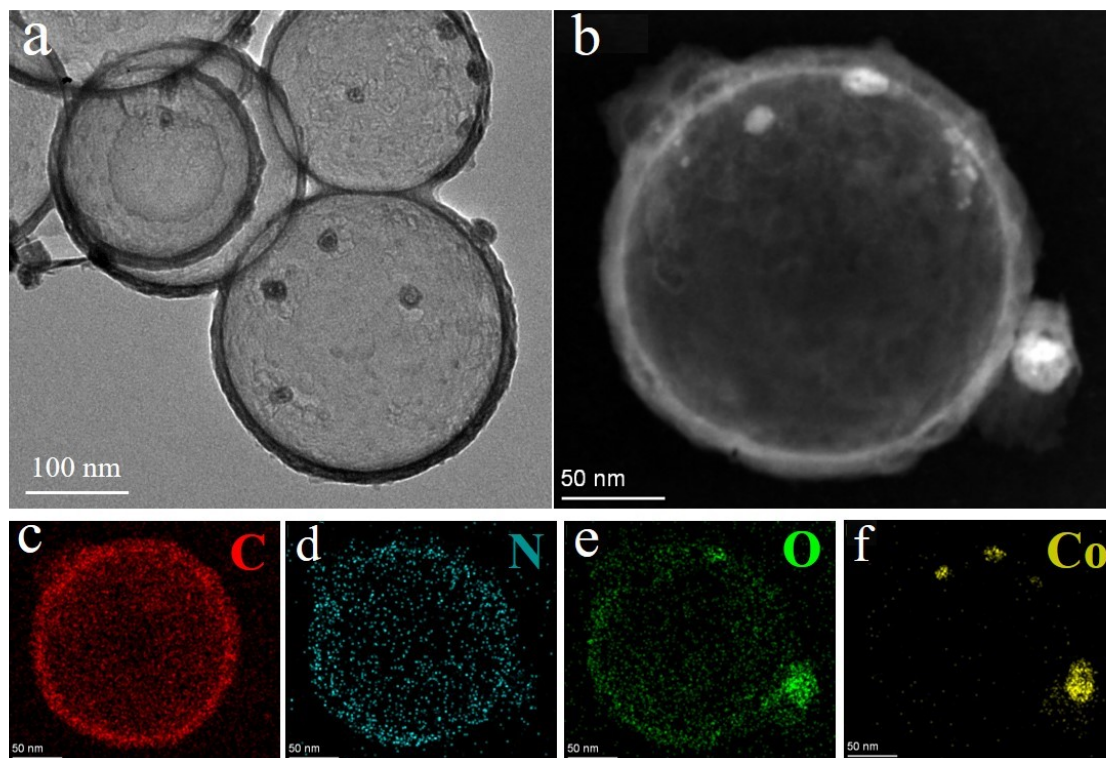

**Figure S8.** a) TEM and (b-f) EDS mapping images of HAADF-STEM elemental mapping images of Co<sub>3</sub>O<sub>4</sub>-10%@N-HPCNs after long-term ORR and OER stability tests.

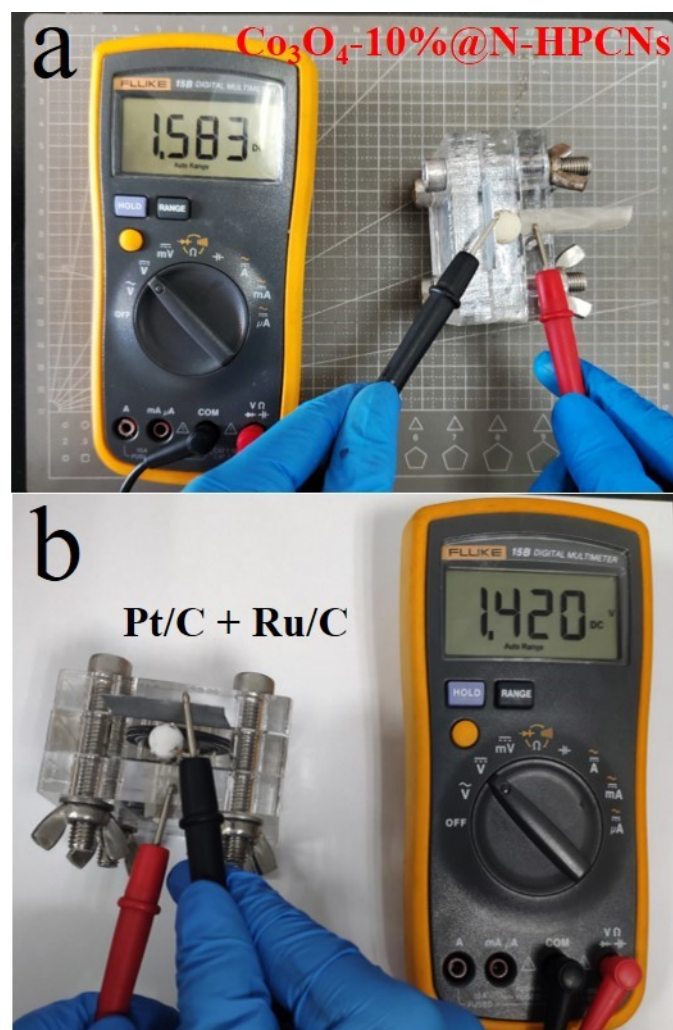

**Figure S9.** Photographs of open-circuit voltage of RZABs based on a)  $\text{Co}_3\text{O}_4\text{-10\%@N-HPCNs}$  and b)  $\text{Pt/C + Ru/C}$ .

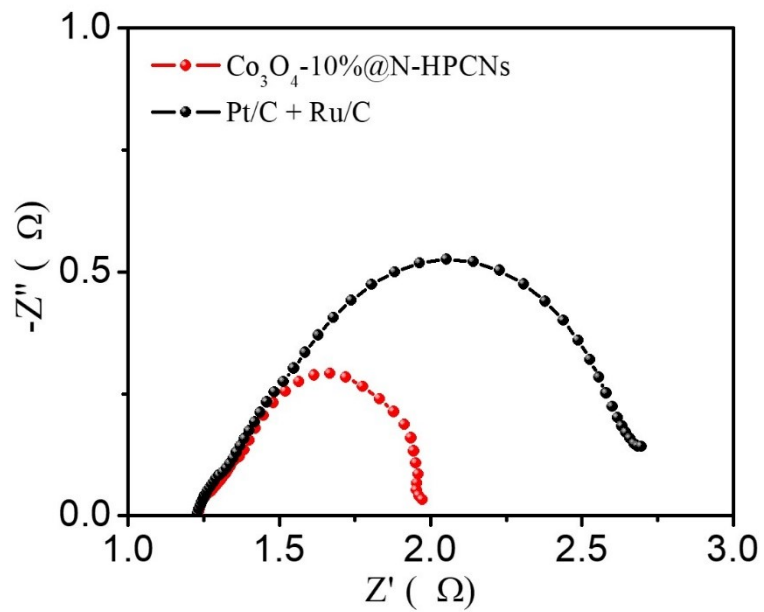

**Figure S10.** Nyquist plots of the RZABs based on  $\text{Co}_3\text{O}_4\text{-10\%@N-HPCNs}$  and  $\text{Pt/C + Ru/C}$ .

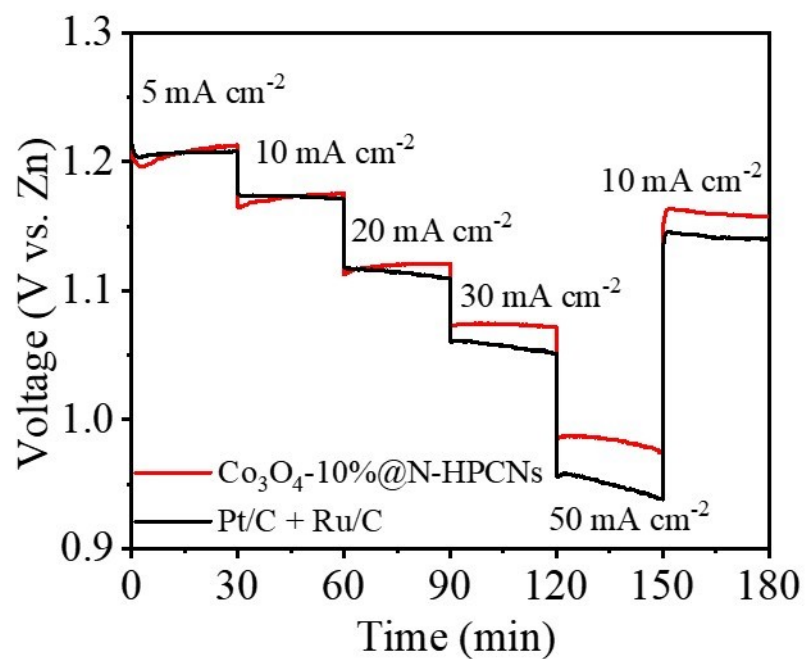

**Figure S11.** Discharge curves of the RZABs based on Co<sub>3</sub>O<sub>4</sub>-10%@N-HPCNs and Pt/C + Ru/C at various discharge current densities.

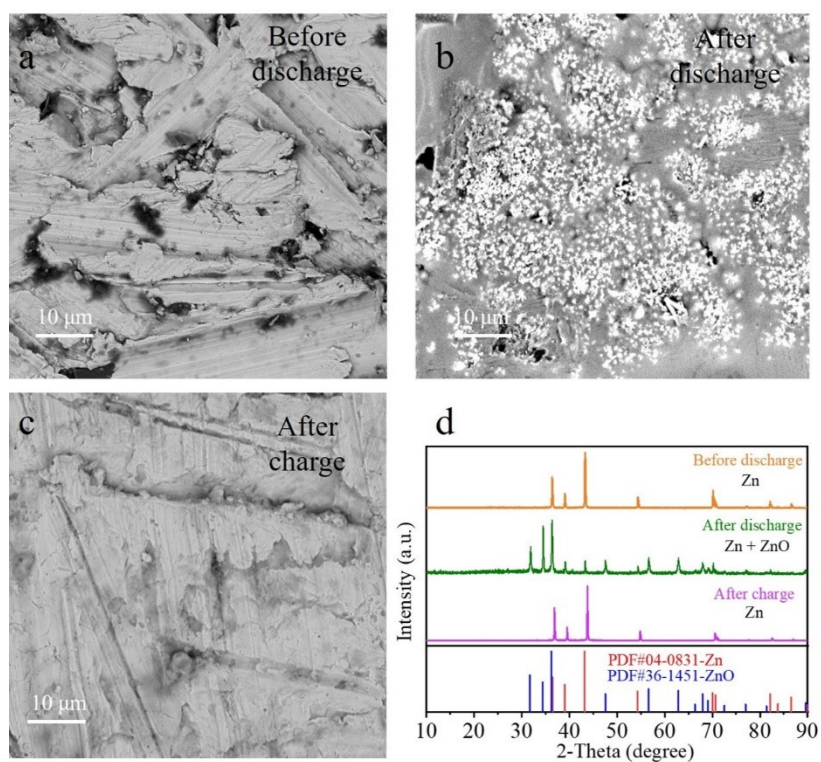

**Figure. S12** The SEM images of Zn anode a) before, b) after discharge and c) after charge, d) the XRD patterns of Zn anode before and after discharge and after charge.

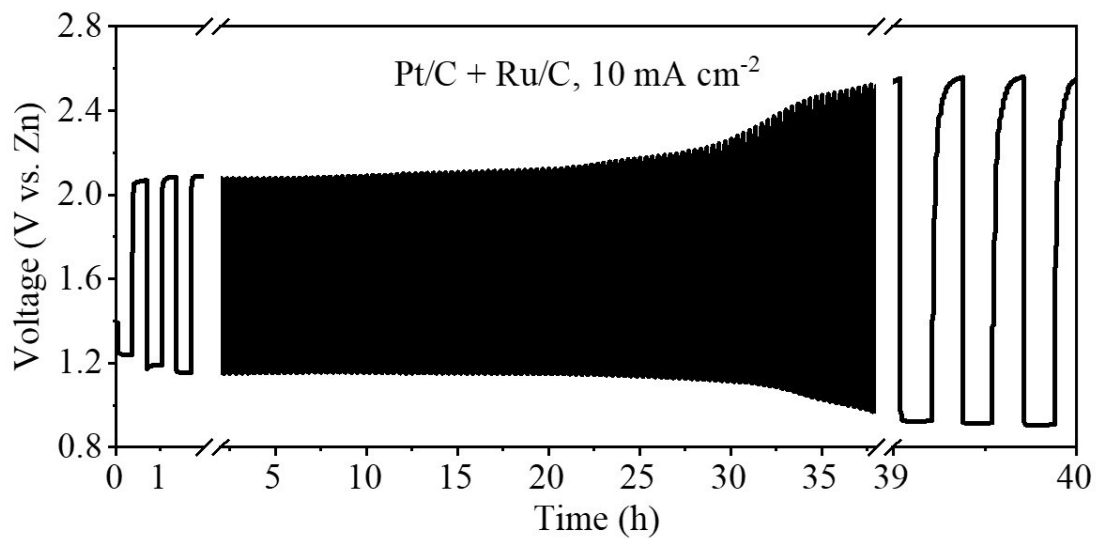

**Figure S13.** Galvanostatic cycling stability of RZABs with Pt/C + Ru/C cathode at a current density of 10 mA cm<sup>-2</sup>.

**Table S1.** Thorough comparison of performances of recently reported bifunctional oxygen electrocatalysts.

| Catalyst                                               | ORR<br>( $E_{1/2}$ , V) | OER<br>( $E_{j=10}$ , V) | Activity<br>( $\Delta E = E_{j=10} - E_{1/2}$ , V) | Reference        |
|--------------------------------------------------------|-------------------------|--------------------------|----------------------------------------------------|------------------|
| <b>Co<sub>3</sub>O<sub>4</sub>-10%@N-HPNCs</b>         | <b>0.83</b>             | <b>1.61</b>              | <b>0.78</b>                                        | <b>This work</b> |
| Co-Co <sub>3</sub> O <sub>4</sub> @NAC                 | 0.79                    | 1.61                     | 0.81                                               | S1               |
| Co <sub>3</sub> O <sub>4</sub> -Co/CoFe@C              | 0.81                    | 1.59                     | 0.78                                               | S2               |
| Co@Co <sub>3</sub> O <sub>4</sub> /NC                  | 0.80                    | 1.65                     | 0.85                                               | S3               |
| Co <sub>9</sub> S <sub>8</sub> -NSHPCNF                | 0.82                    | 1.58                     | 0.76                                               | S4               |
| CoFe <sub>2</sub> O <sub>4</sub> @CNTs                 | 0.78                    | 1.74                     | 0.96                                               | S5               |
| N-CNSP                                                 | 0.85                    | 1.62                     | 0.77                                               | S6               |
| NiO/CoN PINWs                                          | 0.68                    | 1.53                     | 0.85                                               | S7               |
| Co <sub>7</sub> Fe <sub>3</sub> /CFNC                  | 0.83                    | 1.63                     | 0.80                                               | S8               |
| Fe <sub>3</sub> C/Fe <sub>2</sub> O <sub>3</sub> @NGNs | 0.76                    | 1.69                     | 0.93                                               | S9               |
| CNTs@(Fe,Co)PP-700                                     | 0.86                    | 1.80                     | 0.94                                               | S10              |
| Co <sub>2</sub> P/CoN-in-NCNTs                         | 0.85                    | 1.65                     | 0.80                                               | S11              |
| p-CoNi@NSCs                                            | 0.81                    | 1.65                     | 0.84                                               | S12              |
| NiFe-LDH/Co,N-CNF                                      | 0.79                    | 1.54                     | 0.75                                               | S13              |

|                        |      |      |      |     |
|------------------------|------|------|------|-----|
| Co@N-CNT               | 0.83 | 1.61 | 0.78 | S14 |
| Zn-Co-S NN/CFP         | 0.81 | 1.55 | 0.74 | S15 |
| FeCo-NCNFs-800         | 0.79 | 1.68 | 0.89 | S16 |
| ZnCoNC-0.1             | 0.84 | 1.75 | 0.91 | S17 |
| Co-NC@LDH              | 0.80 | 1.60 | 0.80 | S18 |
| CoFe/NGCT              | 0.79 | 1.67 | 0.88 | S19 |
| CoNi/BCF               | 0.80 | 1.60 | 0.80 | S20 |
| Ni <sub>3</sub> Fe/N-C | 0.76 | 1.60 | 0.84 | S21 |
| NCO/N-rGO              | 0.78 | 1.63 | 0.85 | S22 |
| Co@NPCFs               | 0.66 | 1.63 | 0.97 | S23 |
| CoNC-MOG-9             | 0.79 | 1.63 | 0.84 | S24 |

---



| Catalyst                                       | Open circuit voltage (V) | power density (mW cm <sup>-2</sup> ) | Stability of RZABs <sup>a</sup>         | Reference        |
|------------------------------------------------|--------------------------|--------------------------------------|-----------------------------------------|------------------|
| <b>Co<sub>3</sub>O<sub>4</sub>-10%@N-HPNCs</b> | <b>1.583</b>             | <b>145</b>                           | <b>1000 h<br/>10 mA cm<sup>-2</sup></b> | <b>This work</b> |
| Co-Co <sub>3</sub> O <sub>4</sub> @NAC         | 1.449                    | 164                                  | 35 h<br>10 mA cm <sup>-2</sup>          | S1               |
| NiO/CoN PINWs                                  | 1.460                    | 79.6                                 | 8 h<br>3 mA cm <sup>-2</sup>            | S7               |
| Co <sub>7</sub> Fe <sub>3</sub> /CFNC          | 1.446                    | 100.6                                | 260 h<br>10 mA cm <sup>-2</sup>         | S8               |
| CNTs@(Fe,Co)PP-700                             | 1.537                    | 74                                   | 116 h<br>2 mA cm <sup>-2</sup>          | S10              |
| Co <sub>2</sub> P/CoN-in-NCNTs                 | 1.362                    | 194.6                                | 95 h<br>10 mA cm <sup>-2</sup>          | S11              |
| p-CoNi@NSCs                                    | 1.460                    | 87.9                                 | 430 h<br>10 mA cm <sup>-2</sup>         | S12              |
| Co@N-CNT                                       | 1.450                    | 168                                  | 9.5 h<br>20 mA cm <sup>-2</sup>         | S14              |
| FeCo-NCNFs-800                                 | 1.480                    | 74                                   | 40 h<br>10 mA cm <sup>-2</sup>          | S15              |
| CoNi/BCF                                       | 1.438                    | 155.1                                | 30 h<br>10 mA cm <sup>-2</sup>          | S20              |
| Co@NPCFs                                       | 1.450                    | 91.9                                 | 80 h<br>2 mA cm <sup>-2</sup>           | S24              |
| Co@NCNT-300                                    | 1.521                    | 162.5                                | 0.6 h<br>10 mA cm <sup>-2</sup>         | S25              |
| Co-SAs@NC                                      | 1.460                    | 105.3                                | 85 h<br>10 mA cm <sup>-2</sup>          | S26              |
| FeCo@MNC                                       | 1.410                    | 143                                  | 48 h<br>20 mA cm <sup>-2</sup>          | S27              |
| Fe/Co-N/S-C                                    | 1.395                    | 102.6                                | 26.7 h<br>5 mA cm <sup>-2</sup>         | S28              |

|            |       |       |                                |     |
|------------|-------|-------|--------------------------------|-----|
| FeCoMoS@NG | 1.440 | 118   | 70 h<br>2 mA cm <sup>-2</sup>  | S29 |
| CoFe@NC-SE | 1.581 | 102   | 30 h<br>5 mA cm <sup>-2</sup>  | S30 |
| Co@NGC-NSs | 1.360 | 52.3  | 16 h<br>5 mA cm <sup>-2</sup>  | S31 |
| N-HCNT-70  | 1.492 | 189.3 | 84 h<br>10 mA cm <sup>-2</sup> | S32 |
| CoO/NG     | 1.490 | 169.6 | 40 h<br>10 mA cm <sup>-2</sup> | S33 |

---

<sup>a</sup>The cycling conditions and period of rechargeable Zn-air batteries.

## References

- S1. X. Zhong, W. Yi, Y. Qu, L. Zhang, H. Bai, Y. Zhu, J. Wan, S. Chen, M. Yang, L. Huang, M. Gu, H. Pan and B. Xu, *Appl. Catal. B*, 2020, **260**, 118188.
- S2. T. Li, Y. Lu, S. Zhao, Z. Gao and Y. Song, *J. Mater. Chem. A*, 2018, **6**, 3730-3737.
- S3. A. Aijaz, J. Masa, C. Rosler, W. Xia, P. Weide, A. J. Botz, R. A. Fischer, W. Schuhmann and M. Muhler, *Angew. Chem. Int. Ed.*, 2016, **55**, 4087-4091.
- S4. W. Peng, Y. Wang, X. Yang, L. Mao, J. Jin, S. Yang, K. Fu and G. Li, *Appl. Catal. B*, 2020, **268**, 118437.
- S5. N. Xu, J. Qiao, Q. Nie, M. Wang, H. Xu, Y. Wang and X.-D. Zhou, *Catal. Today*, 2018, **318**, 144-149.
- S6. L. Zong, W. Wu, S. Liu, H. Yin, Y. Chen, C. Liu, K. Fan, X. Zhao, X. Chen, F. Wang, Y. Yang, L. Wang and S. Feng, *Energy Stor. Mater.*, 2020, **27**, 514-521.
- S7. J. Yin, Y. Li, F. Lv, Q. Fan, Y. Q. Zhao, Q. Zhang, W. Wang, F. Cheng, P. Xi and S. Guo, *ACS Nano*, 2017, **11**, 2275-2283.
- S8. T. Tu, X. Zhou, P. Zhang, L. Tan, Z. Xu, M. Liu, W. Li, X. Kang, Y. Wu and J. Zheng, *ACS Sustainable Chem. Eng.*, 2022, **10**, 8694-8703.
- S9. Y. Tian, L. Xu, J. Qian, J. Bao, C. Yan, H. Li, H. Li and S. Zhang, *Carbon*, 2019, **146**, 763-771.
- S10. Y. Qi, S. Yuan, L. Cui, Z. Wang, X. He, W. Zhang and T. Asefa, *ChemCatChem*, 2020, **13**, 1023-1033.
- S11. Y. Guo, P. Yuan, J. Zhang, H. Xia, F. Cheng, M. Zhou, J. Li, Y. Qiao, S. Mu and Q. Xu, *Adv. Funct. Mater.*, 2018, **28**, 1805641.
- S12. X. He, J. Fu, M. Niu, P. Liu, Q. Zhang, Z. Bai and L. Yang, *Electrochim. Acta*, 2022, **413**, 140183.
- S13. Q. Wang, L. Shang, R. Shi, X. Zhang, Y. Zhao, G. I. N. Waterhouse, L. Wu, C. Tung and T. Zhang, *Adv. Energy Mater.*, 2017, **7**, 1700467.
- S14. Q. Dong, H. Wang, S. Ji, X. Wang, Z. Mo, V. Linkov and R. Wang, *Chem. Eur. J.*, 2020, **26**, 10752-10758.
- S15. X. Wu, X. Han, X. Ma, W. Zhang, Y. Deng, C. Zhong and W. Hu, *ACS Appl. Mater. Interfaces*, 2017, **9**, 12574-12583.
- S16. L. Yang, S. Feng, G. Xu, B. Wei and L. Zhang, *ACS Sustainable Chem. Eng.*, 2019, **7**, 5462-5475.
- S17. X. Wu, G. Meng, W. Liu, T. Li, Q. Yang, X. Sun and J. Liu, *Nano Research*, 2017, **11**, 163-173.
- S18. D. Chen, X. Chen, Z. Cui, G. Li, B. Han, Q. Zhang, J. Sui, H. Dong, J. Yu, L. Yu and L. Dong, *Chem. Eng. J.*, 2020, **399**, 125718.
- S19. X. Liu, L. Wang, P. Yu, C. Tian, F. Sun, J. Ma, W. Li and H. Fu, *Angew. Chem. Int. Ed.*, 2018, **57**, 16166-16170.
- S20. W. Wan, X. Liu, H. Li, X. Peng, D. Xi and J. Luo, *Appl. Catal. B*, 2019, **240**, 193-200.
- S21. G. Fu, Z. Cui, Y. Chen, Y. Li, Y. Tang and J. B. Goodenough, *Adv. Energy Mater.*, 2017, **7**, 1601172.
- S22. P. Moni, S. Hyun, A. Vignesh and S. Shanmugam, *Chem. Commun. (Cambridge, U. K.)*, 2017, **53**, 7836-7839.

- S23. Y. Chen, W. Zhang, Z. Zhu, L. Zhang, J. Yang, H. Chen, B. Zheng, S. Li, W. Zhang, J. Wu and F. Huo, *J. Mater. Chem. A*, 2020, **8**, 7184-7191.
- S24. N. Shang, S. Li, X. Zhou, S. Gao, Y. Gao, C. Wang, Q. Wu and Z. Wang, *Appl. Surf. Sci.*, 2021, **537**, 147818.
- S25. P. Rao, P. Cui, L. Yang, M. Wang, S. Wang, H. Cai, Y. Wang, X. Zhao, D. P. Wilkinson and J. Zhang, *J. Power Sources*, 2020, **453**, 227858.
- S26. X. Han, X. Ling, Y. Wang, T. Ma, C. Zhong, W. Hu and Y. Deng, *Angew. Chem. Int. Ed.*, 2019, **58**, 5359-5364.
- S27. C. Li, M. Wu and R. Liu, *Appl. Catal. B*, 2019, **244**, 150-158.
- S28. C. Li, H. Liu and Z. Yu, *Appl. Catal. B*, 2019, **241**, 95-103.
- S29. S. Ramakrishnan, J. Balamurugan, M. Vinothkannan, A. R. Kim, S. Sengodan and D. J. Yoo, *Appl. Catal. B*, 2020, **279**, 119381.
- S30. A. Samanta and C. R. Raj, *J. Power Sources*, 2020, **455**.
- S31. P. Thakur, M. Yeddala, K. Alam, S. Pal, P. Sen and T. N. Narayanan, *ACS Appl. Energy Mater.*, 2020, **3**, 7813-7824.
- S32. E. Y. Choi, D. E. Kim, S. Y. Lee and C. K. Kim, *Carbon*, 2020, **166**, 245-255.
- S33. L. Xu, C. Wang, D. Deng, Y. Tian, X. He, G. Lu, J. Qian, S. Yuan and H. Li, *ACS Sustainable Chem. Eng.*, 2019, **8**, 343-350.
